# Supplementary material for: Evaluating atmospheric pressure cold plasma decontamination techniques for packaging materials: a systematic review and meta-analysis
Source: Frontiers journal article supplement (doi:10.3389/fphy.2024.1399720), 2024-04-18
Supplement: Data_Sheet_1.docx [file Data_Sheet_1.docx]

**Search string**

TITLE-ABS-KEY ((plasma OR "gas discharge" OR "ionized gas" OR "ionised gas" OR "electrical discharge" OR "electric discharge") AND (surface OR (packaging OR package)) OR (film OR foil OR polymer OR polymeric OR plastic  OR paper OR nylon OR cellophane OR glass OR pet OR pe OR polyethylene OR polypropylene OR "polyvinyl chloride" OR "polyvinylidene chloride" OR polystyrene OR polyamide OR ethylene OR vinyl) AND (decontamination OR disinfection OR sanitation OR sterilization OR sterilisation OR cleaning OR cleansing OR inactivation OR antimicrobial OR antibacterial OR antiviral OR bactericidal OR germicidal OR microbicidal OR foodborne OR microorganism OR bacteria OR fungi OR spores OR yeast OR micromycete OR virus OR mycotoxin OR mould))
